# Supplementary material
Source: Springer Nature journal article supplement (https://www.springermedizin.de/resource/supplementary/12884_2011_471_MOESM1_ESM.pdf/9458042)

● 135  $\mu\text{g}$  folic acid/100 g bread      -■- 160  $\mu\text{g}$  folic acid/100 g bread

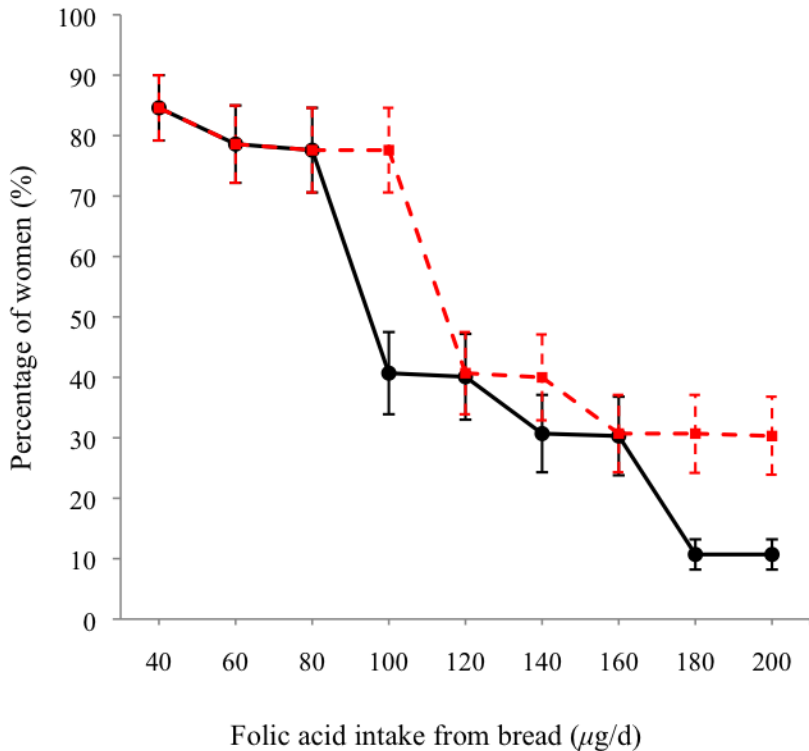

Supplement: MOESM1 [file 9458042]
